# Supplementary material for: Diverse nanostructures underlie thin ultra-black scales in butterflies
Source: Springer Nature journal article supplement (doi:10.1038/s41467-020-15033-1), 2020-03-10
Supplement: 41467_2020_15033_MOESM1_ESM.pdf [file 41467_2020_15033_MOESM1_ESM.pdf]

# Supplementary Materials for

Diverse nanostructures underlie thin ultra-black scales in butterflies

Alexander L. Davis<sup>1\*</sup>, H. Frederik Nijhout<sup>1</sup>, Sönke Johnsen<sup>1</sup>  
Correspondence to: [alexander96davis@gmail.com](mailto:alexander96davis@gmail.com)

**This PDF file includes:**

Supplementary Tables 1,2  
Supplementary Figures 1-5

**Other Supplementary Materials for this manuscript include the following:**

Source Data file

**Supplementary Table 1. Specimen list.** List of specimens with reflectance of the black patches measured in this study ( $n = 16$ ). Hole shape and wing color are indicated in the fourth and fifth column.

| Family              | Subfamily    | Species                           | Color              | Hole Shape  |
|---------------------|--------------|-----------------------------------|--------------------|-------------|
| <b>Nymphalidae</b>  |              |                                   |                    |             |
|                     | Biblidinae   |                                   |                    |             |
|                     |              | <i>Catonephele antinoe</i>        | <b>Ultra-black</b> | Rectangular |
|                     |              | <i>Catonephele numilia (f)</i>    | Black              | Rectangular |
|                     |              | <i>Catonephele numilia (m)</i>    | <b>Ultra-black</b> | Rectangular |
|                     |              | <i>Eunica chlorocroa</i>          | <b>Ultra-black</b> | Chevron     |
|                     | Danainae     |                                   |                    |             |
|                     |              | <i>Euploea dufresne</i>           | <b>Ultra-black</b> | Rectangular |
|                     |              | <i>Euploea klugi</i>              | <b>Ultra-black</b> | Rectangular |
|                     |              | <i>Euploea midamus</i>            | Matte Brown        | Crescent    |
|                     | Heliconinae  |                                   |                    |             |
|                     |              | <i>Heliconius doris</i>           | <b>Ultra-black</b> | Rectangular |
|                     |              | <i>Heliconius ismenius</i>        | Black              | Rectangular |
|                     |              | <i>Heliconius wallacei</i>        | <b>Ultra-black</b> |             |
| <b>Papilionidae</b> |              |                                   |                    |             |
|                     | Papilioninae |                                   |                    |             |
|                     |              | <i>Trogonoptera brookiana (f)</i> | Brown              | Honeycomb   |
|                     |              | <i>Trogonoptera brookiana (m)</i> | <b>Ultra-black</b> | Honeycomb   |
|                     |              | <i>Troides helena</i>             | <b>Ultra-black</b> | Honeycomb   |
|                     |              | <i>Papilio bangui</i>             | <b>Ultra-black</b> |             |
|                     |              | <i>Papilio iphidamus</i>          | <b>Ultra-black</b> |             |
|                     |              | <i>Papilio oribaeus</i>           | <b>Ultra-black</b> |             |

**Supplementary Table 2. Simulation model parameters.** Size parameters used for the FDTD simulations. Parameters were taken from *C. antinoe*, our blackest species.

| <b>Model Parameter</b>  | <b>Size (nm)</b> |
|-------------------------|------------------|
| Hole width (long axis)  | 500              |
| Hole width (short axis) | 330              |
| Inter-lamina distance   | 1200             |
| Ridge height            | 600              |
| Upper lamina thickness  | 200              |
| Crossrib thickness      | 80               |

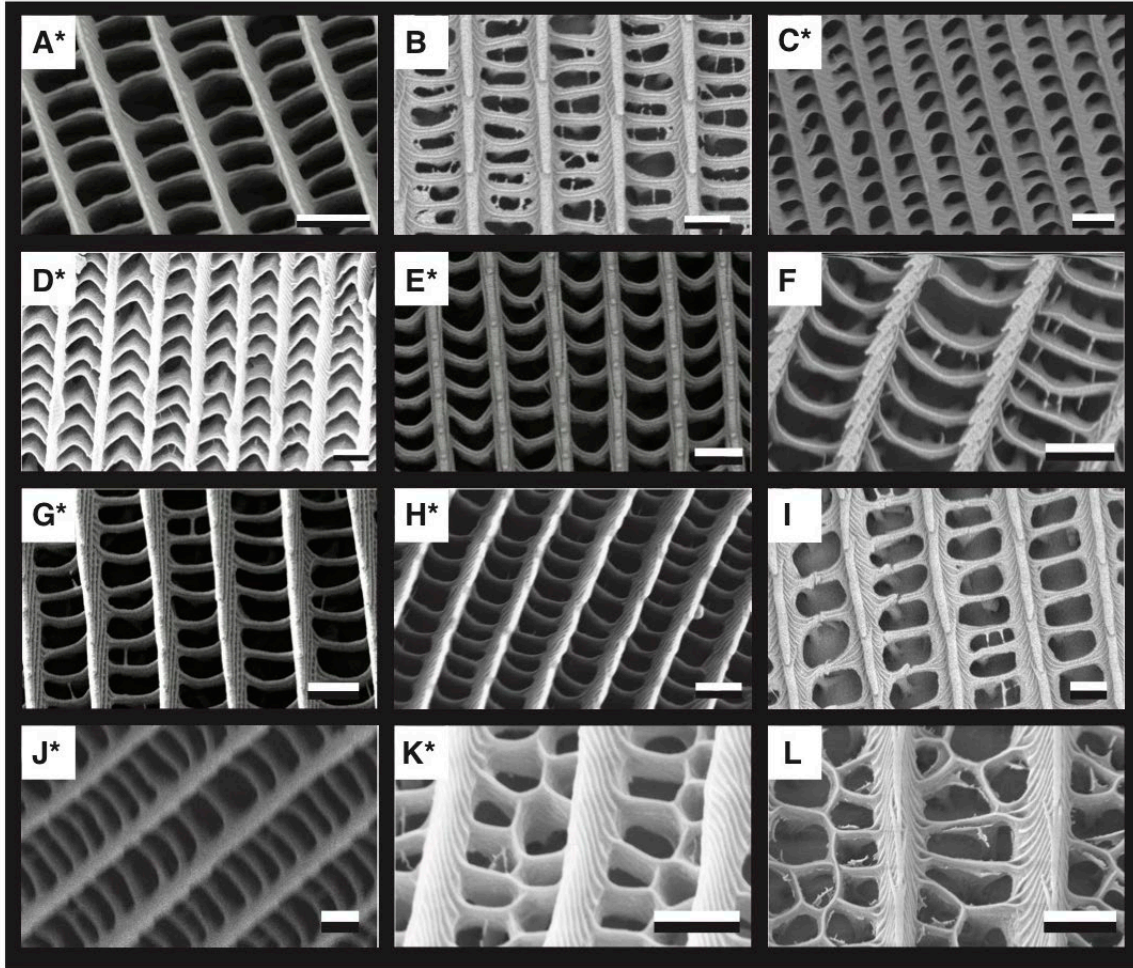

**Supplementary Figure 1. Diversity of hole shapes and sizes.**

(A) *Catonephele antinoe* (B) *Catonephele numilia* female (C) *Catonephele numilia* male (D) *Eunica chlorocroa* (E) *Euploea dufresne* (F) *Euploea midamus* (G) *Euploea klugi* (H) *Heliconius doris* (I) *Heliconius ismenius* (J) *Napeocles jucunda* (K) *Trogonoptera brookiana* male (L) *Trogonoptera brookiana* female; All species possess periodic holes bordered by long ridges, but the holes are smaller in ultra-black species compared to closely related black or brown species. All scale bars are 1  $\mu\text{m}$ . \*denotes ultra-black species.

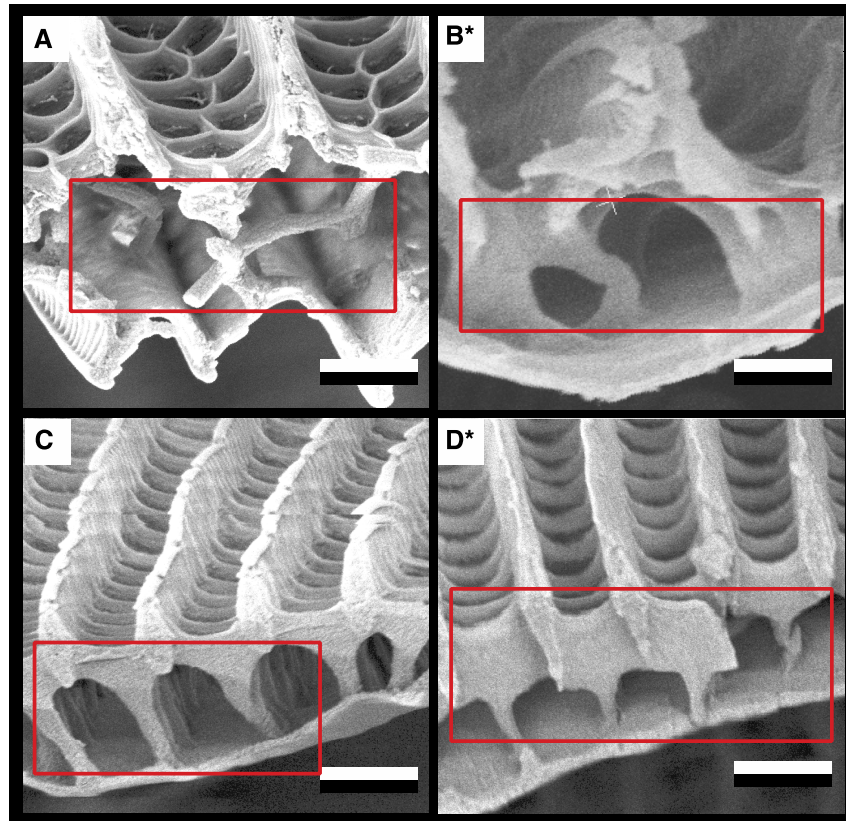

**Supplementary Figure 2. Trabeculae are larger in ultra-black male butterflies compared to regular black female butterflies.**

**(A)** *Trogonoptera brookiana* female **(B)** *Trogonoptera brookiana* male **(C)** *Catonephele numilia* female **(D)** *Catonephele numilia* male. The trabeculae (outlined in the red box) is larger in ultra-black male butterflies than in regular dark brown/black females of the same species.

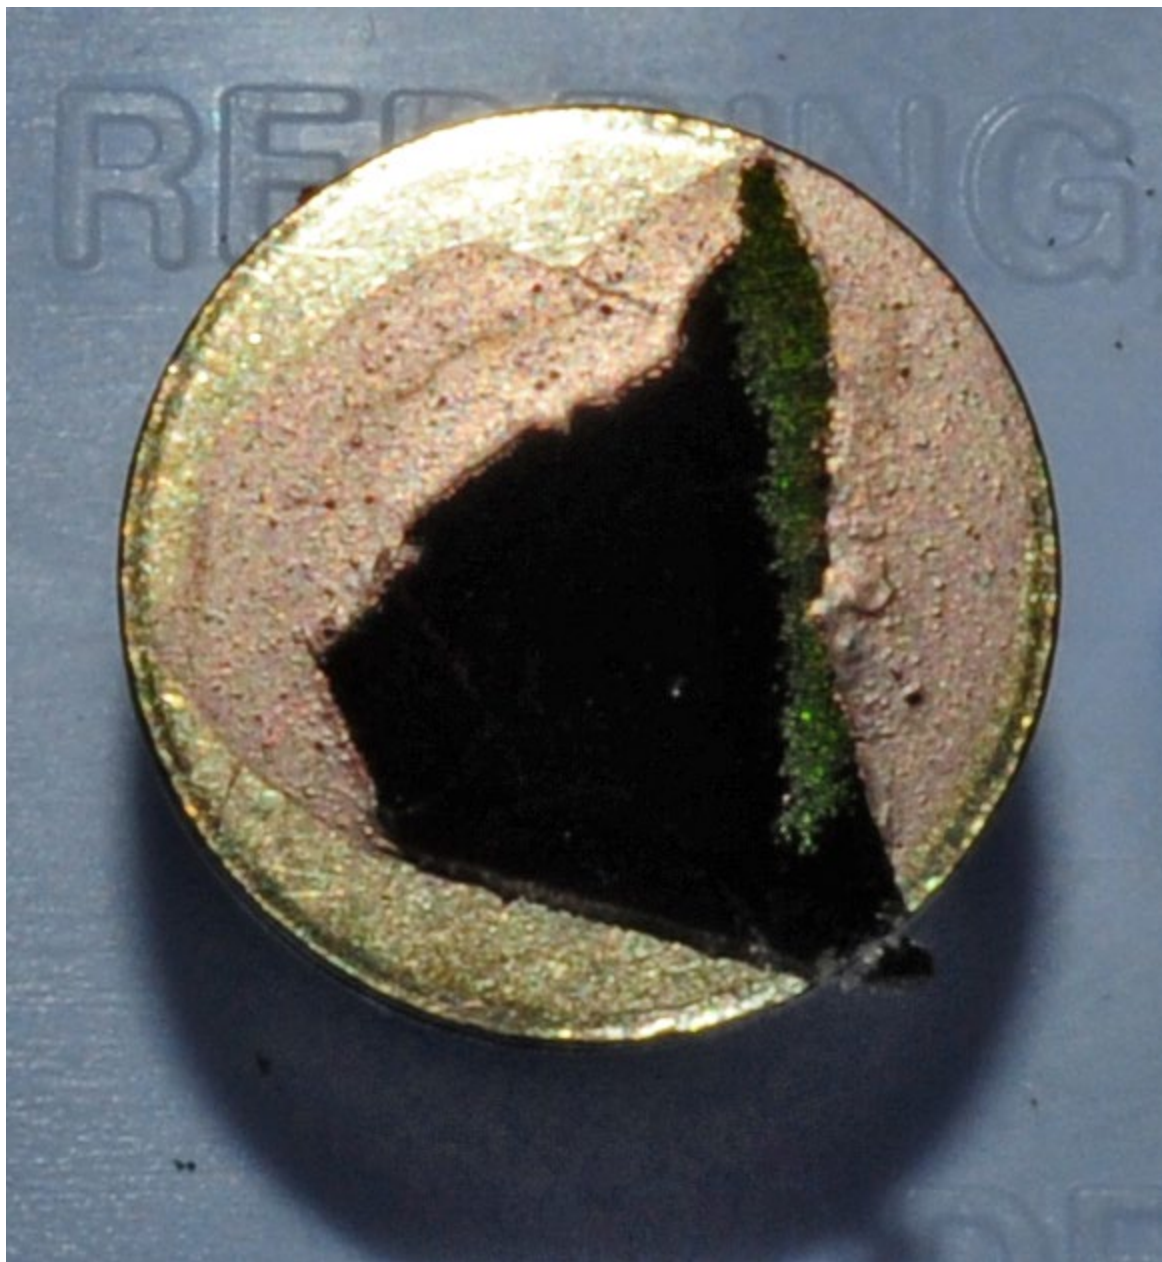

**Supplementary Figure 3. Piece of butterfly wing sputter coated with gold.** Ultra-black butterfly wings are still black when coated with gold, indicating that there is a structural component to the absorption.

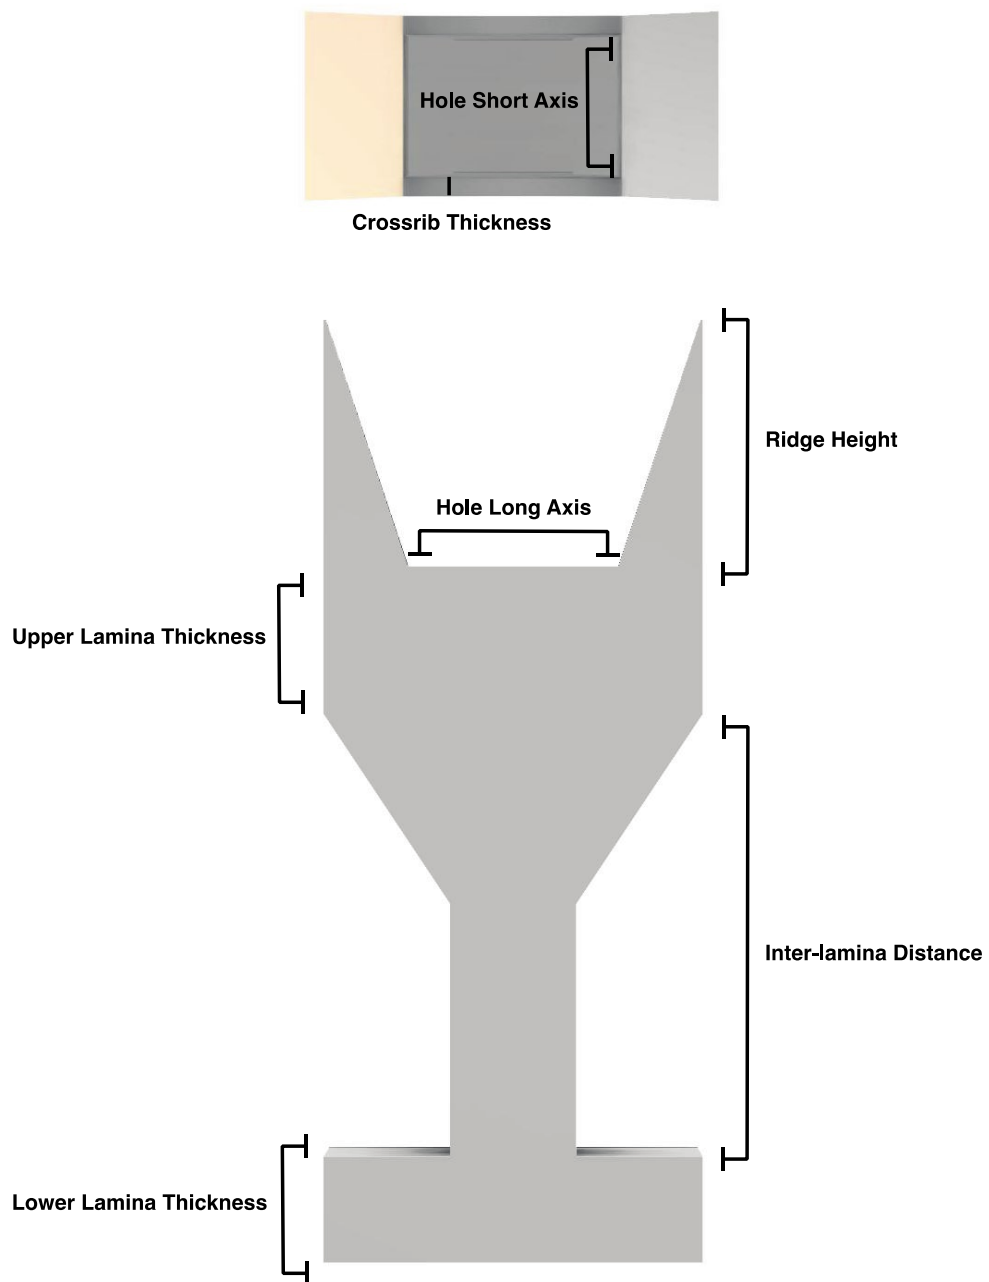

**Supplementary Figure 4. Unit Cell Diagram.** Schematic diagram of the unit cell that was used for FDTD simulations. This unit cell was simulated with periodic boundaries to form a semi-infinite sheet of repeating cells.



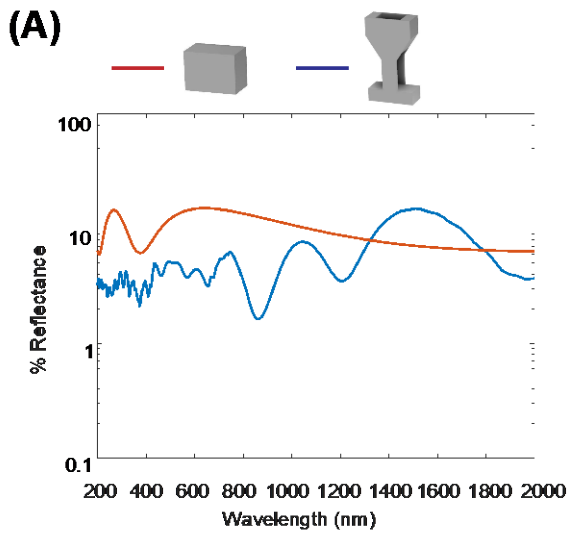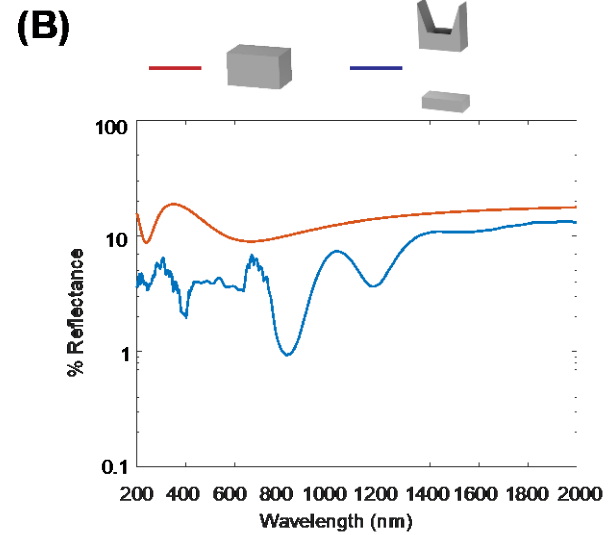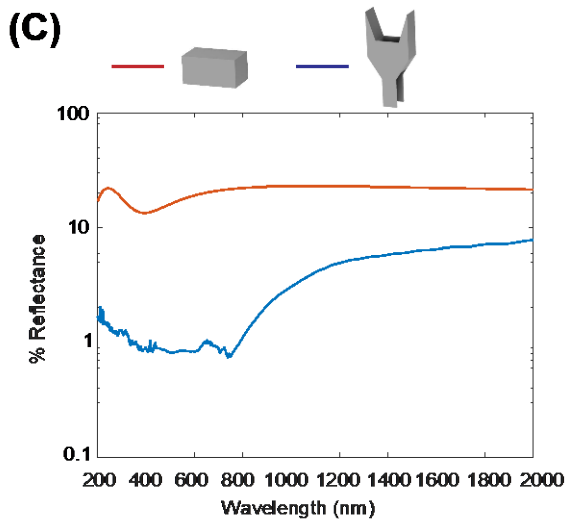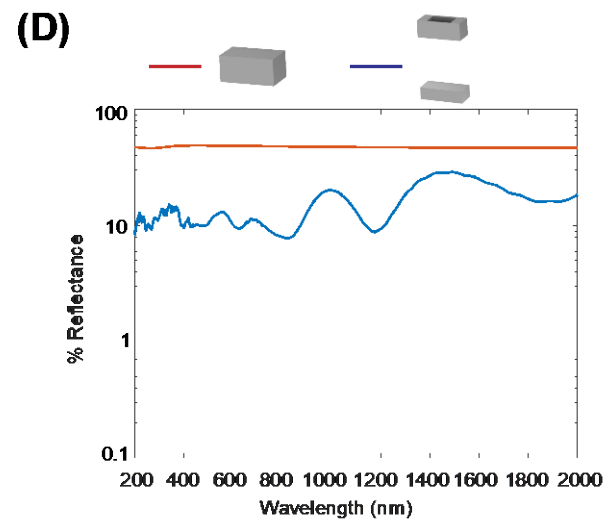

**Supplementary Figure 5. Simulated reflectance of butterfly geometries and blocks consisting of an equal volume of absorbing material.**
